# Supplementary material for: Assessment of the fear of COVID-19 and its impact on lung cancer screening participation among the Korean general population
Source: PubMed Central journal article supplement — Transl Lung Cancer Res. 2021 Dec;10(12):4403–13. doi: 10.21037/tlcr-21-746 (PMC8743514; doi:10.21037/tlcr-21-746), 2021-12
Supplement: tlcr-10-12-4403-dss.pdf [file tlcr-10-12-4403-dss.pdf]

## Data Sharing Statement

|                     |                                                                                                                                                    |                                                                                                                  |
|---------------------|----------------------------------------------------------------------------------------------------------------------------------------------------|------------------------------------------------------------------------------------------------------------------|
| <b>Article Info</b> | <a href="https://dx.doi.org/10.21037/tlcr-21-746">https://dx.doi.org/10.21037/tlcr-21-746</a>                                                      |                                                                                                                  |
| <b>Item</b>         | <b>Question</b>                                                                                                                                    | <b>Authors' Response<br/>(place "-" if not applicable)</b>                                                       |
| 1                   | Would you like to share data collected for your study to others?                                                                                   | Yes                                                                                                              |
| 2                   | If not, would you like to share the reason for your decision?                                                                                      | -                                                                                                                |
| 3                   | What data in particular will be shared?                                                                                                            | Cross-sectional data from the National Cancer Screening Survey 2020.                                             |
| 4                   | Any other documents will be share? Such as study protocol, statistical analysis plan, informed consent form, clinical study report, analytic code. | Other documents could be shared upon request based on the decision of the corresponding author.                  |
| 5                   | When will data availability begin?                                                                                                                 | From the publication date                                                                                        |
| 6                   | When will data availability end?                                                                                                                   | Two years within the publication date.                                                                           |
| 7                   | To whom will you share the data?                                                                                                                   | Any researcher interested in this study.                                                                         |
| 8                   | For what type of analysis or purpose?                                                                                                              | For any type of analysis or research purpose                                                                     |
| 9                   | How or where can the data/documents be obtained?                                                                                                   | Emails could be sent to drheat@ncc.re.kr                                                                         |
| 10                  | Any other restrictions?                                                                                                                            | We may balance the potential benefits and risks for each request and then provide the data that could be shared. |
